# Supplementary material for: A frailty index predicts post-liver transplant morbidity and mortality in HIV-positive patients
Source: PubMed Central journal article supplement (PMC5545092; doi:10.1186/s12981-017-0163-x), 2017-08-05

Deaths

MM

Successful transplant

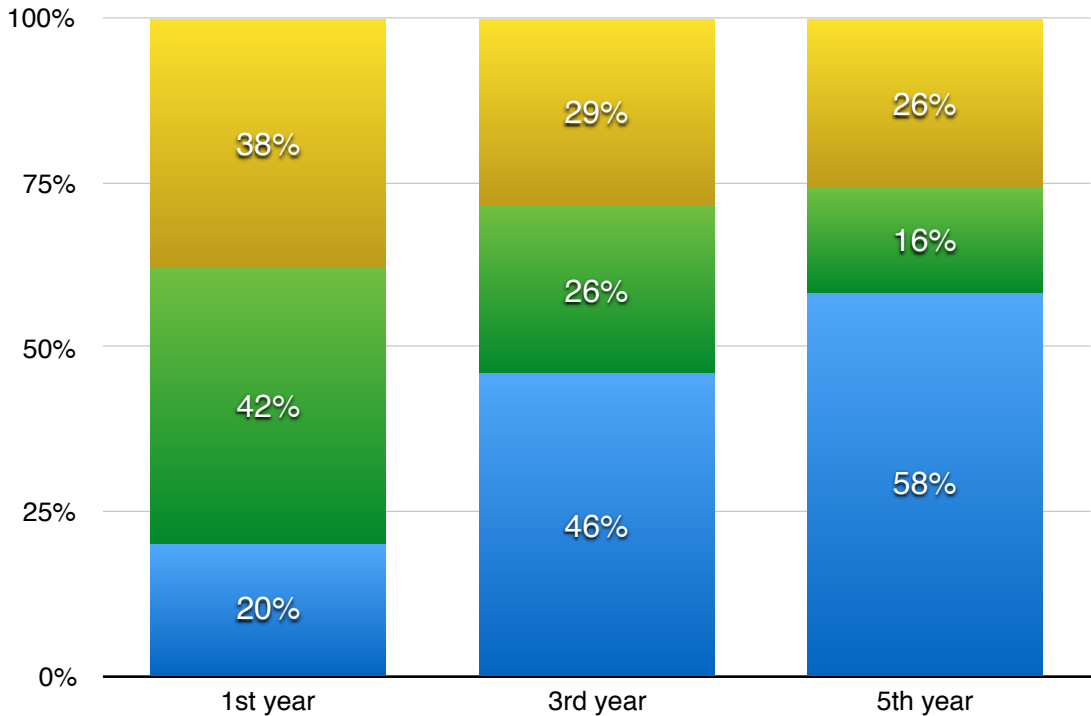

Supplement: 12981_2017_163_MOESM1_ESM.pdf [file 12981_2017_163_MOESM1_ESM.pdf]
